# Supplementary material for: Detecting hallucinations in large language models using semantic entropy
Source: PubMed Central journal article supplement (PMC11186750; doi:10.1038/s41586-024-07421-0), 2024-06-19
Supplement: 41586_2024_7421_MOESM1_ESM.pdf [file 41586_2024_7421_MOESM1_ESM.pdf]

## Supplementary information

---

# Detecting hallucinations in large language models using semantic entropy

---

In the format provided by the authors and unedited

## 1887 Supplementary Material

1888

1889

### 1890 Note 1: Worked Example of Semantic Entropy Calculation

1891

1892 This note provides a worked example of the calculation of semantic entropy. As a

1893

1894 worked example, suppose that we have asked “Where is the Eiffel Tower?”. The

1895 model generates five answers with the length-normalised sequence log-probabilities

1896

1897  $\frac{1}{N} \prod_i^N p(\mathbf{s}_i | \mathbf{s}_i)$  (given in the first column). In this hypothetical example, we happened

1898

1899 to sample the literal string “Paris.” twice, because we are just randomly sampling

1900 from the language model which assigns the string high probability. But we also found

1901

1902 a different string that was equivalent to it, as well as some wrong answers. Note

1903

1904 that in the case of model APIs which do not report the log-probabilities (such as

1905 GPT-4 at time of writing) we will not have the final number, just the text. To

1906

1907 compute the semantic entropy, we cluster these generations into clusters that can

1908

1909 be considered to mean the same thing. We also add up the probabilities associated

1910

| 1911 Generation    | 1912 $p$ | 1911 Naive entropy     |                              |                                              | 1911 Semantic entropy                              |               |                     |                            |
|--------------------|----------|------------------------|------------------------------|----------------------------------------------|----------------------------------------------------|---------------|---------------------|----------------------------|
|                    |          | 1912 $p(\mathbf{s}_i)$ | 1912 $\log[p(\mathbf{s}_i)]$ | 1912 $p(\mathbf{s}_i) \log[p(\mathbf{s}_i)]$ | 1912 $\sum_{\mathbf{s}_i \in C_j} p(\mathbf{s}_i)$ | 1912 $p(C_j)$ | 1912 $\log[p(C_j)]$ | 1912 $p(C_j) \log[p(C_j)]$ |
| 1913 “Paris.”      | 0.20     | 0.33                   | -0.48                        | -0.16                                        | 0.55                                               | 0.90          | -0.04               | -0.04                      |
| 1914 “Paris.”      | 0.20     | 0.33                   | -0.48                        | -0.16                                        | -                                                  | -             | -                   | -                          |
| 1915 “It’s Paris.” | 0.15     | 0.25                   | -0.61                        | -0.15                                        | -                                                  | -             | -                   | -                          |
| 1916 “Rome.”       | 0.05     | 0.08                   | -1.09                        | -0.09                                        | 0.05                                               | 0.08          | -1.09               | -0.09                      |
| 1917 “New York.”   | 0.01     | 0.02                   | -1.79                        | -0.03                                        | 0.01                                               | 0.02          | -1.79               | -0.03                      |
| Sum                | 0.61     | 1.00                   | -4.45                        | -0.59                                        | 0.61                                               | 1.00          | -2.92               | -0.16                      |

#### 1918 Supplementary Table 1: Worked example of Semantic Entropy Calculation.

1919 The raw token sequence probabilities for each generation,  $p$ , are in the first column.

1920 Note that they do not sum to one because they are the probabilities associated with

1921 each actually sampled outcome, and if we sample many generations their sum will

1922 exceed one. To calculate the naive entropy of the output distribution, in the second

1923 column we compute an estimator of the normalised probability for each generated

1924 sequence,  $p(\mathbf{s}_i)$ , by dividing each probability by the sum of the first column. These now

1925 do sum to one (up to a rounding error). One way to estimate the naive entropy would

1926 then be to multiply each log-probability by the probability, sum them (and multiply by

1927 -1, not shown). For the semantic entropy, we instead look at the probabilities summed

1928 up within each meaning-cluster. We compute log-probabilities in the same way, and

1929 then compute the entropy of the resulting distribution. The resulting entropy is much

1930 lower, because several generations meant the same thing as each other (final column).

1931 All values to two decimal places.

1932

with each one. This value is reported in the fifth column (the first under the heading “Semantic entropy”). To compute the semantic entropy we compute the negative sum of the expectation of the log-probabilities (Eq. (5)). That is, we get the result  $0.16 = -0.9 \log(0.9) - 0.08 \log(0.08) - 0.02 \log(0.02)$ .

For the “discrete” variant of semantic entropy we effectively treat the probability of sampling each of the generations as uniform, by using it as an empirical distribution that approximates the underlying distribution. This means that for the “Paris.” cluster we get a weight of  $0.6=0.2+0.2+0.2$  and a weight of 0.2 for the other two clusters. That is, the discrete semantic entropy here is  $0.41 = -0.6 \log(0.6) - 0.2 \log(0.2) - 0.2 \log(0.2)$ .

Although these two methods produce different absolute results, we find that in practice they tend to agree fairly well on relative ordering, which is what is used in practice to classify confabulations. As a result, the cluster approximation of semantic entropy is a fairly good alternative in cases where the log-probabilities are not disclosed.

## Note 2: Choosing an Entailment Estimator

### *Sentence-length Generations*

We confirm that the bi-directional entailment classifier works as expected. Prior work has show that in some settings NLI methods can systematically fail<sup>78</sup>, so we seek to ascertain whether these failures substantially affect typical question-answering. Two raters manually labeled 100 pairs of sentence-length generations from LLaMA 2 Chat 70B for three of our datasets for entailment, recording whether they believed that sentence A entailed sentence B. They rated each entailment as: **entailment**, **neutral**, **contradiction**. For the purpose of measuring agreement we combine the neutral and contradiction ratings, because our method is searching for positive entailment. We found that the human raters agreed with each other (87%) at roughly the same rate that they on average agreed with GPT-4 (87%) while they agreed with GPT-3.5 only

1933  
1934  
1935  
1936  
1937  
1938  
1939  
1940  
1941  
1942  
1943  
1944  
1945  
1946  
1947  
1948  
1949  
1950  
1951  
1952  
1953  
1954  
1955  
1956  
1957  
1958  
1959  
1960  
1961  
1962  
1963  
1964  
1965  
1966  
1967  
1968  
1969  
1970  
1971  
1972  
1973  
1974  
1975  
1976  
1977  
1978

|               | DeBERTa | LLaMA 2 Chat 70B | GPT-3.5 | GPT-4 | Human A | Human B |
|---------------|---------|------------------|---------|-------|---------|---------|
| Human A       | 0.81    | 0.78             | 0.83    | 0.89  | -       | 0.87    |
| Human B       | 0.78    | 0.80             | 0.84    | 0.85  | 0.87    | -       |
| Human Average | 0.80    | 0.79             | 0.83    | 0.87  | -       | -       |

**Supplementary Table 2: Manual entailment evaluation.** Inter-rater agreement on entailment classification for pairs of sentence-length answers produced by LLaMA 2 Chat 70B to 100 questions from each of SQuAD, TriviaQA, and BioASQ (600 answers in total). On average, the human raters agreed with each other to approximately the same extent that they agreed with GPT-4, while GPT-3.5 was only slightly less predictive of human-assessed entailment.

slightly less on average (83%). As a result, because GPT-3.5 is more than an order of magnitude cheaper, we use GPT-3.5 for all entailment calculations for sentence-length generations on SQuAD, TriviaQA, BioASQ, SVAMP, and NQ Open. Presumably our method would perform better with a more expensive entailment estimator. Supplementary table 2 shows the detailed agreement results between the human raters and the entailment estimation.

In addition to validating human agreement with the entailment models, we also investigate the performance of semantic entropy with different entailment strategies. In supplementary table 3, we report AUROC values of semantic entropy with various entailment models for predictions from a LLaMA 2 Chat 70B model on TriviaQA, SQuAD, and BioASQ. The LLaMA 2 Chat 70B model performs worst, followed by the purpose-built DeBERTa model and GPT models, where this time version 3.5 slightly outperforms version 4 on average. For these experiments, unlike our main results, we used only 8 generations (normally 10) to estimate the entropy and measured accuracy relative to the reference answer using LLaMA 2 Chat 70B (normally GPT-4, see section on ‘Assessing Accuracy’).

|          | DeBERTa | LLaMA 2 Chat 70B | GPT-3.5 | GPT-4 |
|----------|---------|------------------|---------|-------|
| TriviaQA | 0.83    | 0.70             | 0.85    | 0.83  |
| SQuAD    | 0.76    | 0.71             | 0.77    | 0.80  |
| BioASQ   | 0.75    | 0.73             | 0.87    | 0.79  |
| Average  | 0.78    | 0.71             | 0.83    | 0.80  |

**Supplementary Table 3: Entailment Method Ablation.** AUROC values for semantic entropy when using different models to compute entailment for sentence-length generations from LLaMA 2 Chat 70B. Semantic entropy performs better when prompted GPT models predict entailment rather than a purpose-built DeBERTa model.

### *Paragraph-length Generations*

In supplementary figure 1, we report our experiments for several entailment prediction variants for paragraph-length generations, in addition to our default non-defating bi-directional DeBERTa method. We also experimented with several entailment variants: “GPT-4 two-way” asks GPT-4 to evaluate whether the sentences mean the same thing directly (“Do the following two possible answers to the subquestion mean the same thing?” instead of “Does Possible Answer 1 semantically entail...”); “GPT-4 ‘equivalent’” instead asks “Are the following two possible answers to the subquestion semantically equivalent?”; while “GPT-4 simultaneous ‘equivalent’ ” provides all of the possible answers and asks “Are the following answers equivalent?”. All of these methods were substantially worse.

### **Note 3: Limitations to Clustering by Entailment**

In idealized examples, it is clear when two sentences do or do not mean the same thing as each other. In practice, it can sometimes be that sentence A seems to mean the same as B, and B the same as C, but A and C don’t seem to mean the same thing. That is, because semantic equivalence is fuzzy it does not always intuitively behave transitively, meaning that the assumptions behind our equivalence classes do not hold in practice.

2025  
2026  
2027  
2028  
2029  
2030  
2031  
2032  
2033  
2034  
2035  
2036  
2037  
2038  
2039  
2040  
2041  
2042  
2043  
2044  
2045  
2046  
2047  
2048  
2049  
2050  
2051  
2052  
2053  
2054  
2055  
2056  
2057  
2058  
2059  
2060  
2061  
2062  
2063  
2064  
2065  
2066  
2067  
2068  
2069  
2070

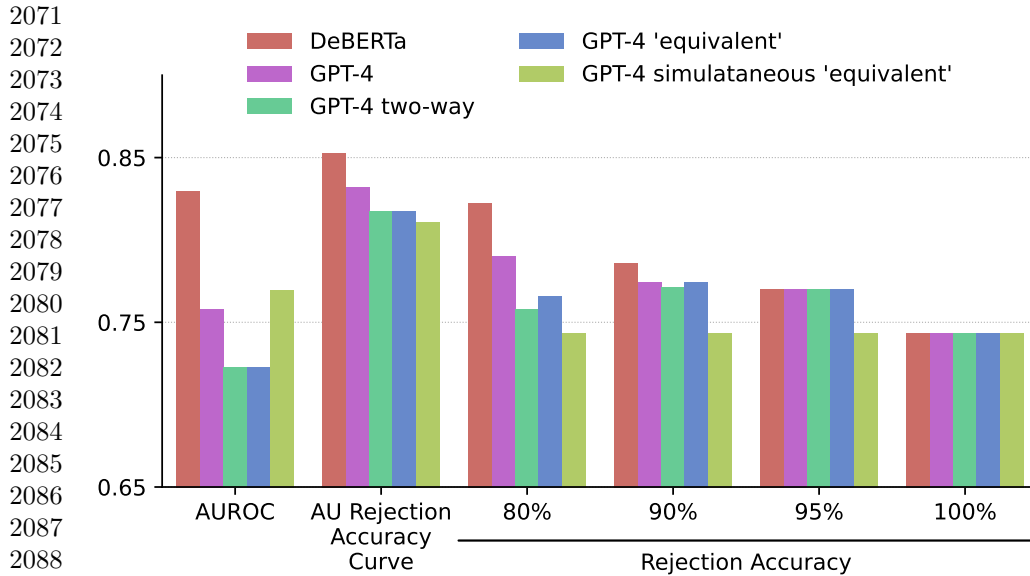

2090 **Supplementary Figure 1: Entailment method choice for paragraph biogra-**  
 2091 **phies.** Implementing the non-defeating bi-directional entailment with DeBERTa  
 2092 provided the best empirical results for paragraph biography confabulation detection.  
 2093

2094  
 2095 Similarly, there are cases where bi-directional entailment does *not* mean that two  
 2096 sentences mean the same thing. For example, “John drove his car to the store.” and  
 2097 “John went to the store in his car.” generally imply each other and would be marked  
 2098 as “entailment” by most classifiers, and this reflects the fact that they mean more-  
 2099 or-less the same thing. But, for example, this depends somewhat on the context and  
 2100 various aspects of implicature<sup>76</sup>. For example, if we have other reasons to think that  
 2101 John might have been the owner of the car but a passenger, rather than the driver,  
 2102 then we might judge the two sentences to not mean the same thing as each other.  
 2103 As an alternative example of a failure of bi-directional entailment to correspond with  
 2104 semantic equivalence, sentences with scalar adverbs such as “Paris might be in France”  
 2105 and “Paris might not be in France” can entail each other while meaning something  
 2106 quite different<sup>77</sup>.

For questions whose answers are straightforward, relatively objective, factual, and not vague these problems may not be significant. In particular, we did not observe any of these problems arising in manual inspection of outputs during any of our experiments. Nevertheless, for subtle situations and applications we would encourage practitioners to check these assumptions.

#### **Note 4: Computational Cost and Choosing the Number of Generations**

The bi-directional equivalence algorithm is combinatorially complex in  $M$ , the number of samples generated, as it requires  $\binom{M}{2}$ -many comparisons in the worst-case. In practice, however, the computational cost is small compared to the cost of generating sequences.

First,  $M$  does not necessarily need to be very large. We show how the confabulation-detection performance (measured by AUROC) changes with  $M$  for sentence-length generations in supplementary figure 2 and for FactualBio paragraphs in supplementary figure 3. For sentence-length generations, after roughly  $M = 5$  there are diminishing returns, although going up to  $M = 10$  can still help. In this paper, we use  $M = 10$  for sentence-length generations as well as short-phrase generations. For this ablation, we produce generations using LLaMA 2 Chat 70B but several experimental characteristics differ from those of our main results. We check entailment using GPT-4 (standardly GPT-3.5), measure accuracy using LLaMA 2 Chat 70B (standardly GPT-4), and use 8 generations to estimate entropy (standardly 10). For paragraph-length biographies, we find that four total factoids (three new generations plus the original factoid) seems optimal (see supplementary figure 3). Unlike the standard setting, more generations is not strictly better, because it decreases the relative weight on the original factoid which increases the risk of a badly posed question that generates irrelevant answers.

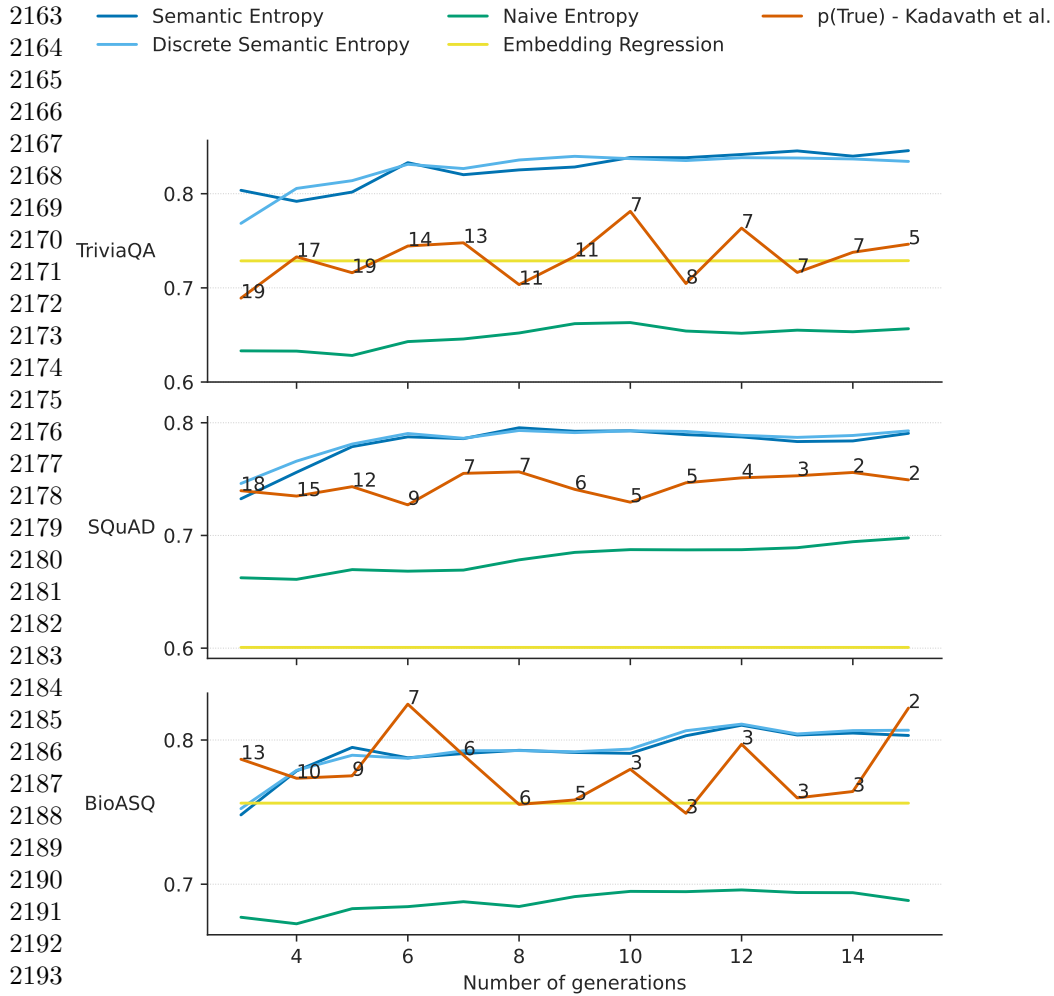

**Supplementary Figure 2: Number of sentence-length generations used for entropy.** We find diminishing returns to increasing the number of generations sampled for the semantic entropy estimation, but select 10 as a reasonable number for results in this paper. The numbers annotating  $p(\text{True})$  illustrate the number of few-shot examples we were able to include without exceeding the maximal input size for each dataset and number of generations.

Second, when using the DeBERTa-large model, it is so much smaller than the main language model, each pair comparison is much faster than generating even one token from the main model. Using GPT-3.5 to do clustering is considerably more expensive than DeBERTa.



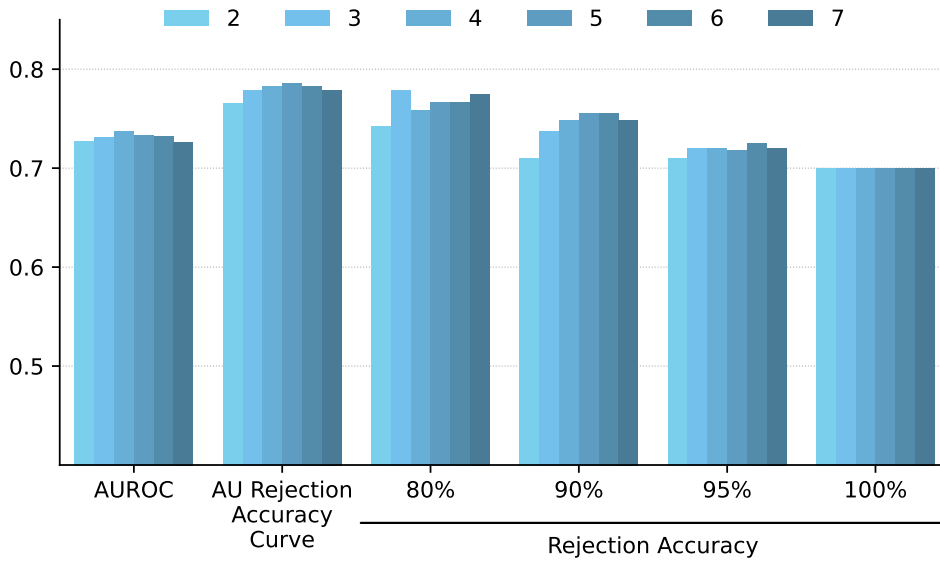

**Supplementary Figure 3: Number of factoid generations used in paragraph-length biographies.** We find that confabulation-detection performance is not very sensitive to the number of generations, but that four total factoids per question (including the original one) results in competitive performance.

Third, because semantic equivalence is transitive we only need to compare one member of each equivalence class to the remaining sequences (see algorithm in Extended Data Figure 1). The number of semantic clusters in our tasks is empirically often quite low which means that far fewer than the worst-case number of comparisons are actually needed in practice. In supplementary figure 4, we show some empirical numbers of clusters for several key datasets.

Fourth, because the LLM often generates identical sequences in practice, we can cache entailments. For example, if the LLM’s three generations in response to a question are “Paris.”, “It’s in Paris.”, and “Paris.” we can do a (very computationally cheap) *string level* comparison of the final “Paris.” to the previous generations and, on finding that it is the identical text to the earlier string, we can use the previously calculated entailments. We find that in practice this reduces the computational costs

2209  
2210  
2211  
2212  
2213  
2214  
2215  
2216  
2217  
2218  
2219  
2220  
2221  
2222  
2223  
2224  
2225  
2226  
2227  
2228  
2229  
2230  
2231  
2232  
2233  
2234  
2235  
2236  
2237  
2238  
2239  
2240  
2241  
2242  
2243  
2244  
2245  
2246  
2247  
2248  
2249  
2250  
2251  
2252  
2253  
2254

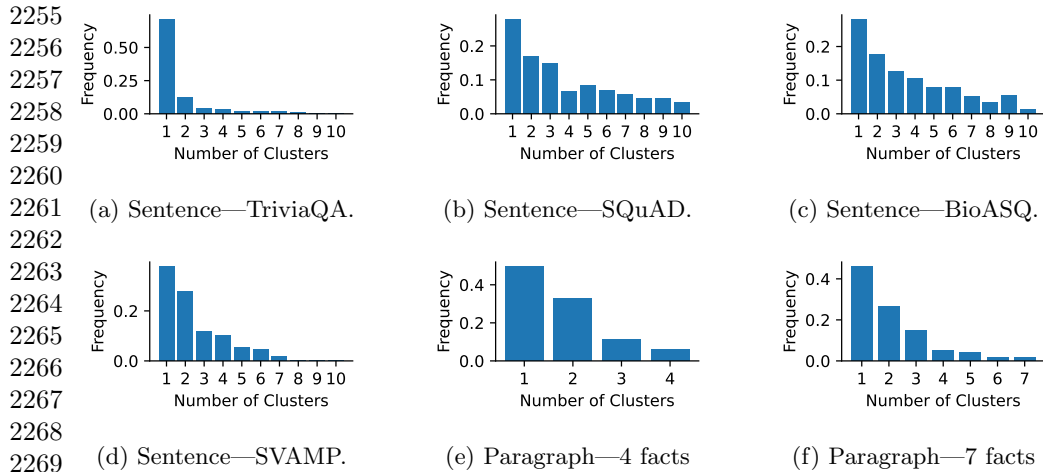

2270 **Supplementary Figure 4:** In many cases, relatively few clusters are found, which  
 2271 can improve computational efficiency. The easiest dataset (TriviaQA) generally has  
 2272 fewest clusters because the answers are confident. In our results for the paragraph-  
 2273 length task, we use 4-factoids per question as shown in (supplementary figure 4e), but  
 2274 increasing the number of generations does not greatly increase the number of clusters  
 2275 (supplementary figure 4f). All sentence-length-generation plots are for LLaMA 2 Chat  
 2276 70B while the paragraph-generation plots are GPT-4.  
 2277

2278  
 2279 by 51.4% for TriviaQA, 12.3% for BioASQ, and 18.0% for SQuAD (with the size of  
 2280 the improvement caused by the proportion of identical answers produced by the model  
 2281 for those datasets).  
 2282

2283  
 2284  
 2285 **Note 5: Further Details for Sentence-Length Generations.**  
 2286

2287 Here, we provide an unaggregated view of the sentence-length AUROCs which form  
 2288 Figure 2. Individual datasets and models follow a very similar pattern to the average,  
 2289 as shown in supplementary figure 5  
 2290

2291 We also provide a more detailed view of the rejection accuracies at proportions of  
 2292 answers retained for sentence-length generations in supplementary figure 6.  
 2293

2294  
 2295  
 2296  
 2297  
 2298  
 2299  
 2300

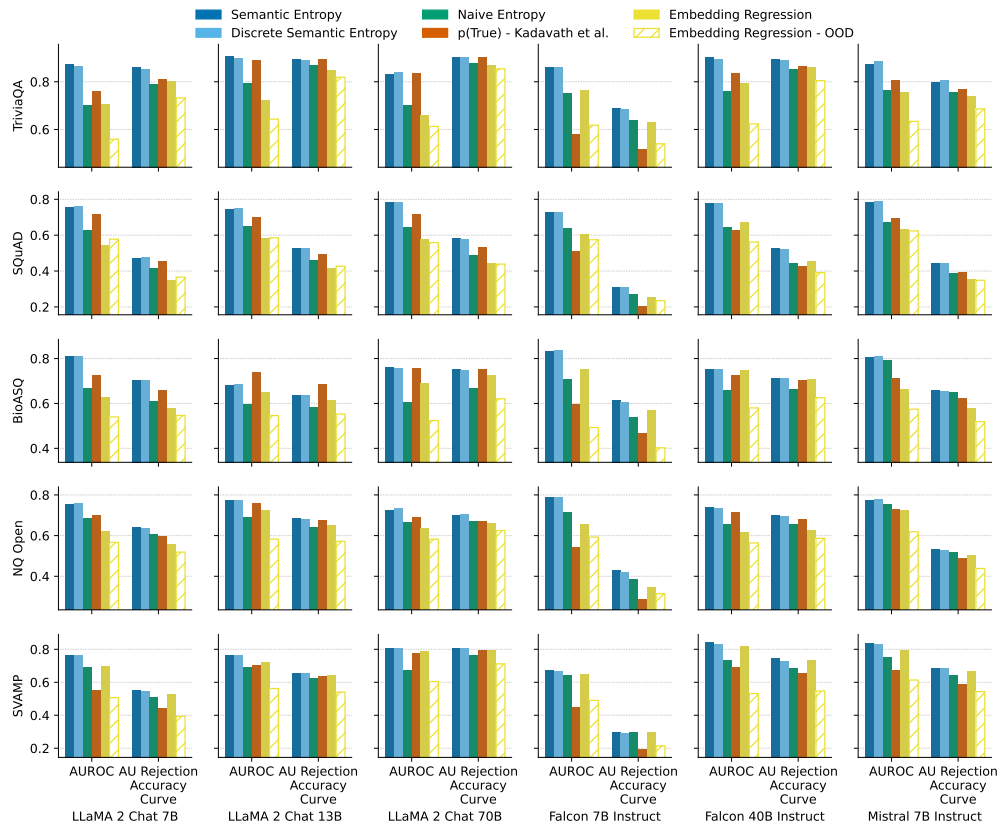

**Supplementary Figure 5: Sentence-length confabulation detection—full AUROC.** An unaggregated view of the AUROCs shown in Figure 2.

### Note 6: Assessing Model Accuracy

We check the quality of our automated ground-truth evaluation (using GPT-4 to compare the model generation with the reference answer) against human judgement by hand on sentence-length answers produced by LLaMA 2 Chat 70B responding to 100 questions from TriviaQA, SQuAD, and BioASQ. In each case, we check whether a generated answer matches the reference answer. Even if doing this reveals that the reference answer is wrong, which sometimes happens, we are interested in knowing whether humans and the automatic methods agree on the match, not on whether they know the actual correct answer. Supplementary table 4 shows the two human raters

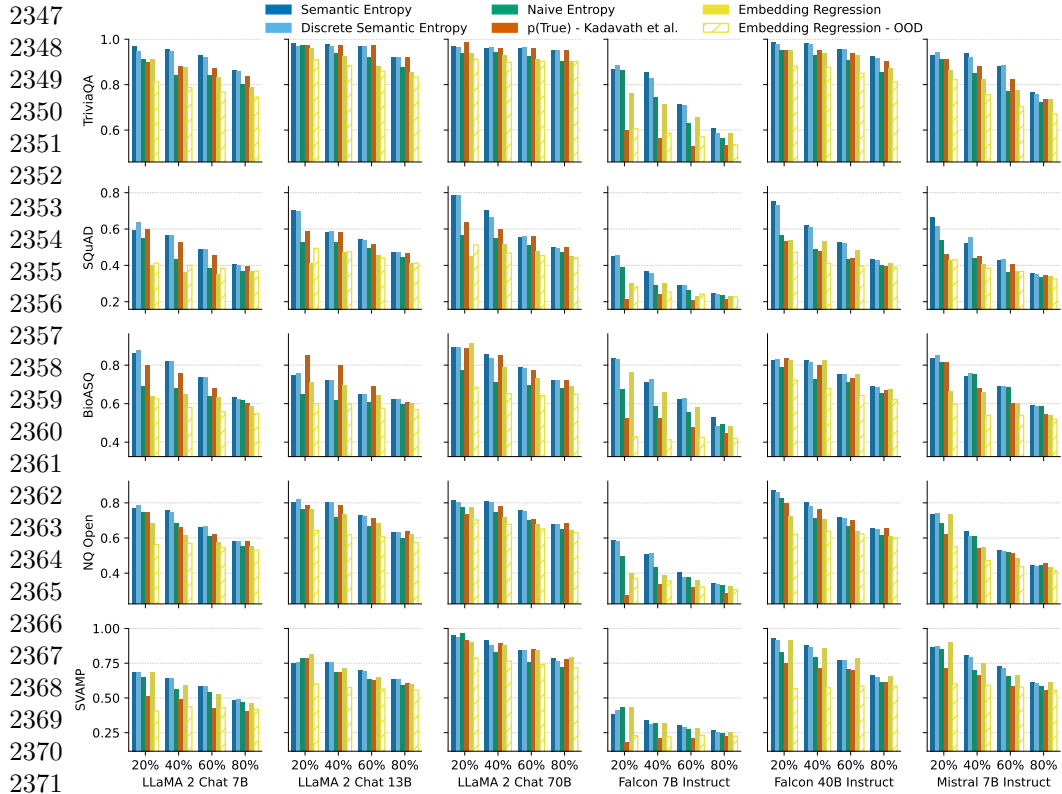

2372 **Supplementary Figure 6: Sentence-length confabulation detection—**  
 2373 **rejection accuracy.** A more detailed view of the rejection accuracies of the figures  
 2374 provides further elaboration of the findings in Figure 2.  
 2375

2376  
 2377 agreed with each other at roughly the same rate (92%) as they agreed with GPT-4 on  
 2378 average (93%). While GPT-3.5 is only slightly worse, in order to get the best ground-  
 2379 truth estimation feasible, we use GPT-4 to compare the generated answer with the  
 2380 reference answers provided in the dataset for results in this paper.  
 2381  
 2382  
 2383

2384  
 2385 **Note 7: Results for Short-Phrase Generation**  
 2386

2387 In the main text, we provide results for sentence-length and paragraph-length gen-  
 2388 eration. Here, we show results for a “short-phrase” scenario where we prompt the  
 2389 model to “Answer the following question as briefly as possible”. Additionally, we here  
 2390  
 2391  
 2392

|               | F1   | LLaMA 2 Chat 70B | GPT-3.5 | GPT-4 | Human A | Human B |
|---------------|------|------------------|---------|-------|---------|---------|
| Human A       | 0.48 | 0.92             | 0.88    | 0.92  | -       | 0.92    |
| Human B       | 0.47 | 0.93             | 0.90    | 0.93  | 0.92    | -       |
| Human Average | 0.47 | 0.92             | 0.89    | 0.93  | -       | -       |

**Supplementary Table 4: Ground truth evaluation.** We evaluate different automatic accuracy measures against human evaluation on sentence-length answers produced by LLaMA 2 Chat 70B on 100 randomly chosen questions from TriviaQA, SQuAD, and BioASQ. We find that GPT-4 agrees with both human raters at roughly the same level as they agree with each other.

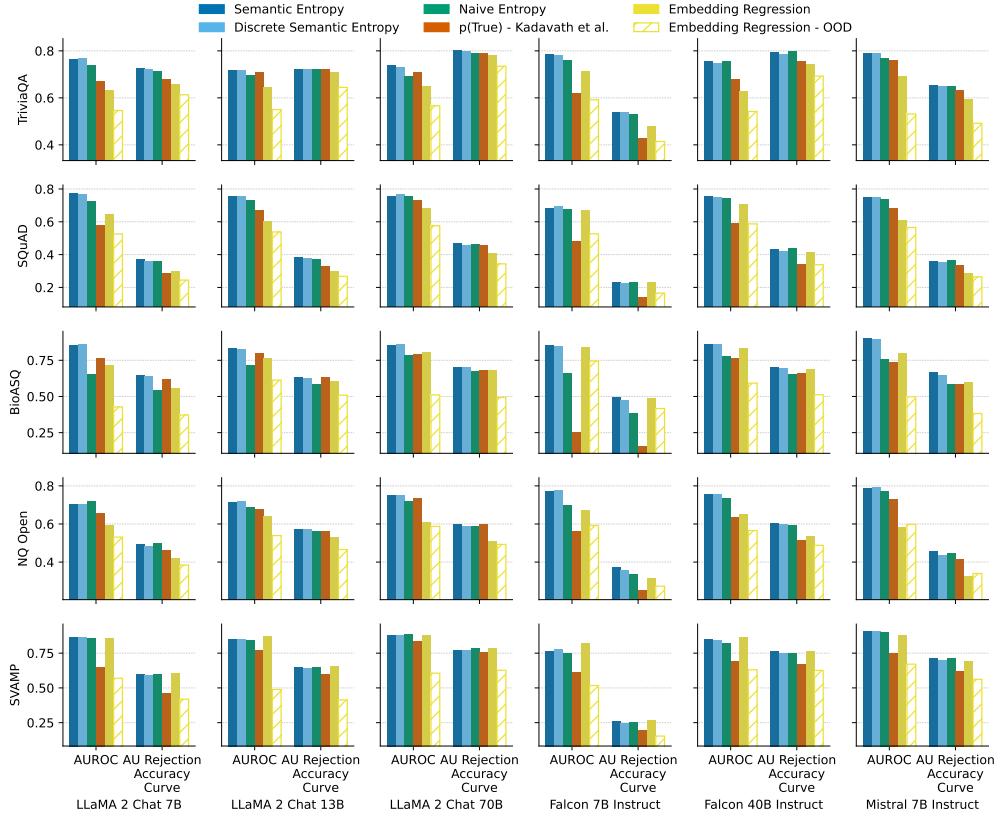

**Supplementary Figure 7: Short-Phrase confabulation detection.** With a prompt that encourages short generations, we achieve a lower average answer length ( $15.9 \pm 21.8$  characters compared to  $95.6 \pm 69.6$  for sentence-length generations). Semantic entropy still works well compared to  $p(\text{True})$  and embedding regression, although its advantage over naive entropy is smaller to due to the lower syntactic variability of the shorter generations.

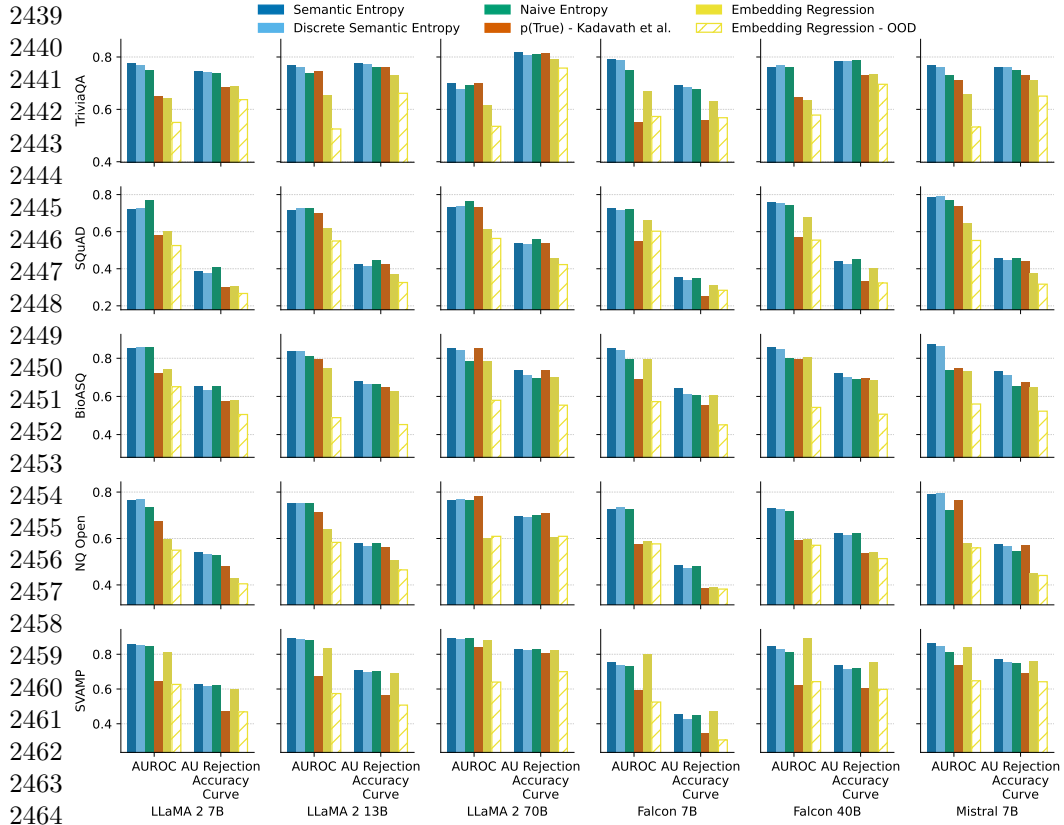

2465 **Supplementary Figure 8: Short-Phrase confabulation detection—Non-**  
 2466 **instruction-tuned models.** Models that have not been instruction-tuned have  
 2467 slightly different output-distribution characteristics to instruction-tuned models. How-  
 2468 ever, we find that both classes of models show broadly similar results and that semantic  
 2469 entropy continues to outperform baselines in this setting.  
 2470

2471  
 2472 employ five few-shot QA demonstrations before the main question, all following the  
 2473 template introduced above, which further encourages the LLM to predict with brevity  
 2474 as the reference answers are usually very short for our selection of datasets. The short-  
 2475 phrase scenario is less practically relevant, as users commonly interact with longer  
 2476 LLM generations, although some settings value brevity and directness.  
 2477  
 2478

2480 For short-phrase generations we use the DeBERTa entailment classifier method  
 2481 to check for strict bi-directional entailment, because this is cheaper and well-suited  
 2482 to short phrases. In addition to the instruction-tuned LLaMA, Falcon, and Mistral  
 2483  
 2484

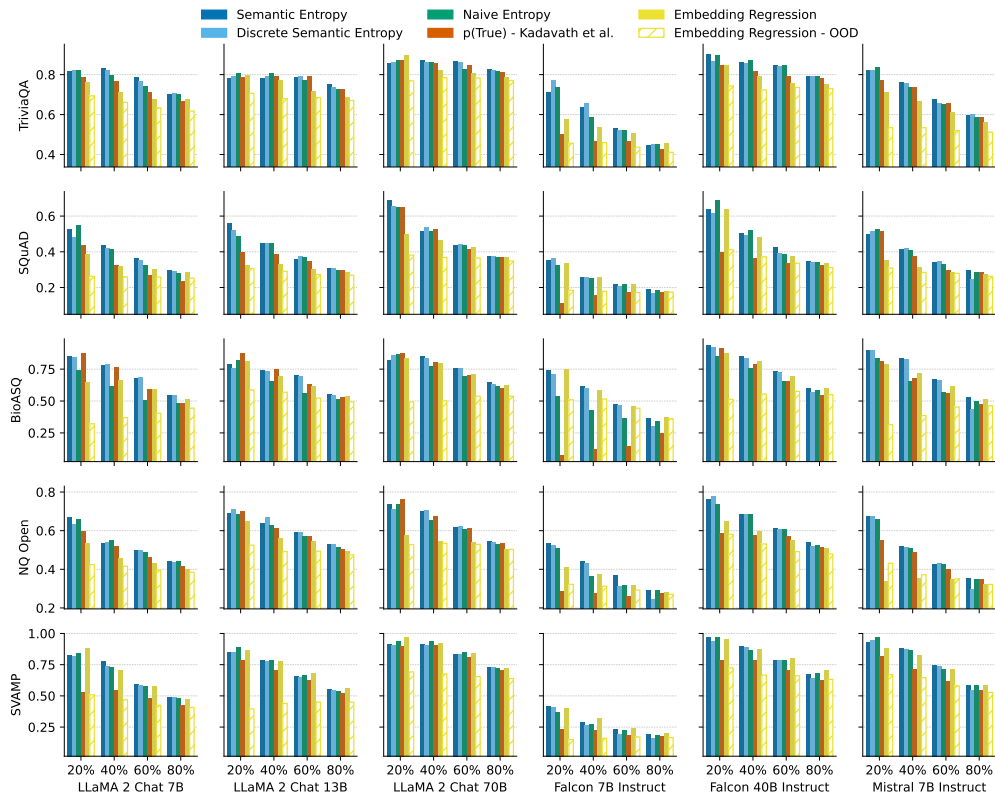

**Supplementary Figure 9: Short-Phrase confabulation detection—rejection accuracy.** A more detailed view of the rejection accuracies of the figures provides further elaboration of the findings in supplementary figure 7.

models we use in the sentence-length experiments, we additionally report results on the non-instruction-tuned LLaMA, Falcon, and Mistral models (which are not effective when applied to the sentence-length generation setting).

In supplementary figure 7, we show that results in this setting are broadly similar to those in the longer setting, with semantic entropy improving over  $p(\text{True})$ , embedding regression baseline, and naive entropy. In supplementary figure 8 we show this also holds for non-instruction-tuned models. Although non-instruction-tuned models have

2485  
2486  
2487  
2488  
2489  
2490  
2491  
2492  
2493  
2494  
2495  
2496  
2497  
2498  
2499  
2500  
2501  
2502  
2503  
2504  
2505  
2506  
2507  
2508  
2509  
2510  
2511  
2512  
2513  
2514  
2515  
2516  
2517  
2518  
2519  
2520  
2521  
2522  
2523  
2524  
2525  
2526  
2527  
2528  
2529  
2530

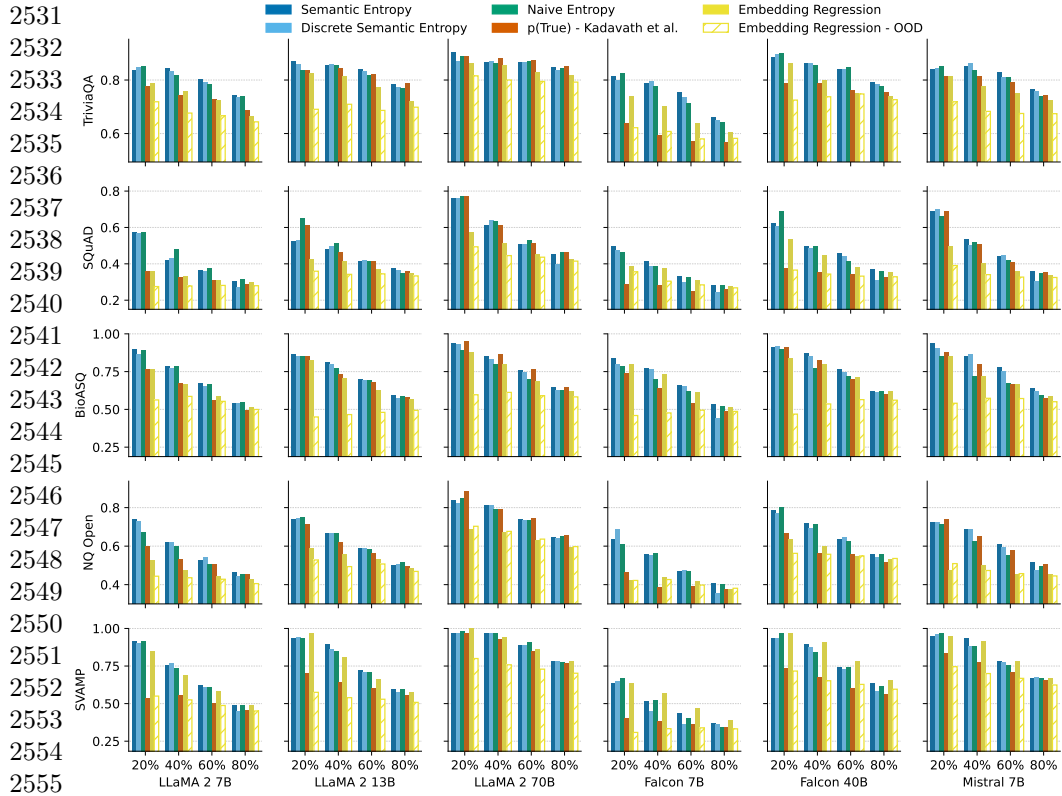

2531  
2532  
2533  
2534  
2535  
2536  
2537  
2538  
2539  
2540  
2541  
2542  
2543  
2544  
2545  
2546  
2547  
2548  
2549  
2550  
2551  
2552  
2553  
2554  
2555  
2556 **Supplementary Figure 10: Short-Phrase confabulation detection—rejection**  
2557 **accuracy for non-instruction tuned models.** A more detailed view of the rejection  
2558 accuracies of the figures provides further elaboration of the findings in supplementary  
2559 figure 7.

2560  
2561  
2562 slightly different distributional characteristics—tending to have better-calibrated out-  
2563 put probabilities—we find that semantic entropy continues to outperform the baselines  
2564 in this setting.

2567 Averaged across the 60 combinations of tasks and models we study for the short-  
2568 phrase setting, semantic entropy and discrete semantic entropy achieve the best mean  
2569 AUROC (see below) values of 0.792 and 0.790 while naive entropy 0.760,  $p(\text{True})$  0.683,  
2570 and the embedding regression baseline 0.708 lag behind it. Notably, semantic entropy  
2571 continues to improve over  $p(\text{True})$  and the embedding regression baseline by about 0.10  
2572 AUROC. However, naive entropy performs better than for longer generations, although  
2573  
2574  
2575  
2576



semantic entropy does still improve over it by 0.03 on average (and by significantly more for individual datasets and models). This is because longer answers exhibit more of the syntactic variation that causes naive entropy to fail, and requiring answers to be as short as possible reduces the opportunity for variation.

In supplementary figure 9 we provide a more detailed view of the rejection accuracies at different proportions of answers retained. Lastly, supplementary figure 10 shows rejection accuracies for non-instruction tuned models.

## References

- [76] Herbert Paul Grice. *Studies in the Way of Words*. Harvard University Press, Cambridge, 1989.
- [77] Isabelle Lorge and Janet B. Pierrehumbert. Not wacky vs. definitely wacky: A study of scalar adverbs in pretrained language models. *BlackBoxNLP Workshop at EMNLP*, 2023.
- [78] Nick McKenna, Tianyi Li, Liang Cheng, Mohammad Javad Hosseini, Mark Johnson, and Mark Steedman. Sources of hallucination by large language models on inference tasks. In *Findings of EMNLP*, 2023.

2577  
2578  
2579  
2580  
2581  
2582  
2583  
2584  
2585  
2586  
2587  
2588  
2589  
2590  
2591  
2592  
2593  
2594  
2595  
2596  
2597  
2598  
2599  
2600  
2601  
2602  
2603  
2604  
2605  
2606  
2607  
2608  
2609  
2610  
2611  
2612  
2613  
2614  
2615  
2616  
2617  
2618  
2619  
2620  
2621  
2622
